# Supplementary material for: M1BP is an essential transcriptional activator of oxidative metabolism during Drosophila development
Source: PubMed Central journal article supplement (PMC10238438; doi:10.1038/s41467-023-38986-5), 2023-06-02
Supplement: 41467_2023_38986_MOESM3_ESM.pdf [file 41467_2023_38986_MOESM3_ESM.pdf]

## Description of Additional Supplementary Files

**File Name:** Supplementary Data 1

**Description:** Genes encoding proteins required for OXPHOS complex formation

**File Name:** Supplementary Data 2

**Description:** Differential gene expression analysis of M1BP RNAi in myoblasts

**File Name:** Supplementary Data 3

**Description:** Differential gene expression analysis of M1BP RNAi in 48 h APF DLMs

**File Name:** Supplementary Data 4

**Description:** Differential gene expression analysis of M1BP RNAi in 64 h APF DLMs

**File Name:** Supplementary Data 5

**Description:** Differential gene expression analysis of M1BP RNAi in adult DLMs

**File Name:** Supplementary Data 6

**Description:** Differential gene expression of mitochondrial DNA-encoded genes

**File Name:** Supplementary Data 7

**Description:** Identification of transcription factor binding sites in promoters of nuclear-encoded OXPHOS complex components

**File Name:** Supplementary Data 8

**Description:** Differential gene expression of genes involved in a cellular proteotoxic response

**File Name:** Supplementary Movie 1

**Description:** The inner mitochondrial membrane encompasses and isolates an aggregate. Tomographic reconstruction of a mitochondrial aggregate taken from dual-axis tomographic serial sections. Tomogram was joined and segmented with surface rendering showing the aggregate in gold and the encompassing inner mitochondrial membrane in cyan. Source data are provided as a Source Data File
